# Supplementary material for: Photoinduced NO-release from polymer dots doped with an Ir(iii) complex and N-methyl-N-nitroso-4-aminophenol
Source: Royal Society of Chemistry journal article supplement (doi:10.1039/d3ob00047h), 2023-01-01
Supplement: d3ob00047h1.pdf [file d3ob00047h1.pdf]

## Appendix A. Supplementary data

Photoinduced NO-Release from Polymer Dots Doped with an Ir(III) Complex and *N*-Methyl-*N*-nitroso-4-aminophenol

Daisuke Saitoh<sup>a</sup>, Ayumi Suzuki<sup>b</sup>, Naoya Ieda<sup>a</sup>, Zuoyue Liu<sup>c</sup>, Yasuko Osakada<sup>c,d,e</sup>, Mamoru Fujitsuka<sup>c,e</sup>, Mitsuyasu Kawaguchi<sup>a</sup>, Hidehiko Nakagawa<sup>a</sup>

<sup>a</sup>Graduate School of Pharmaceutical Sciences, Nagoya City University, <sup>b</sup>Faculty of Pharmaceutical Sciences, Nagoya City University, <sup>c</sup>SANKEN (The Institute of Scientific and Industrial Research), Osaka University, <sup>d</sup>Institute for Advanced Co-Creation Studies, Osaka University, <sup>e</sup>Innovative Catalysis Science Division, Institute for Open and Transdisciplinary Research Initiatives (ICS-OTRI), Osaka University

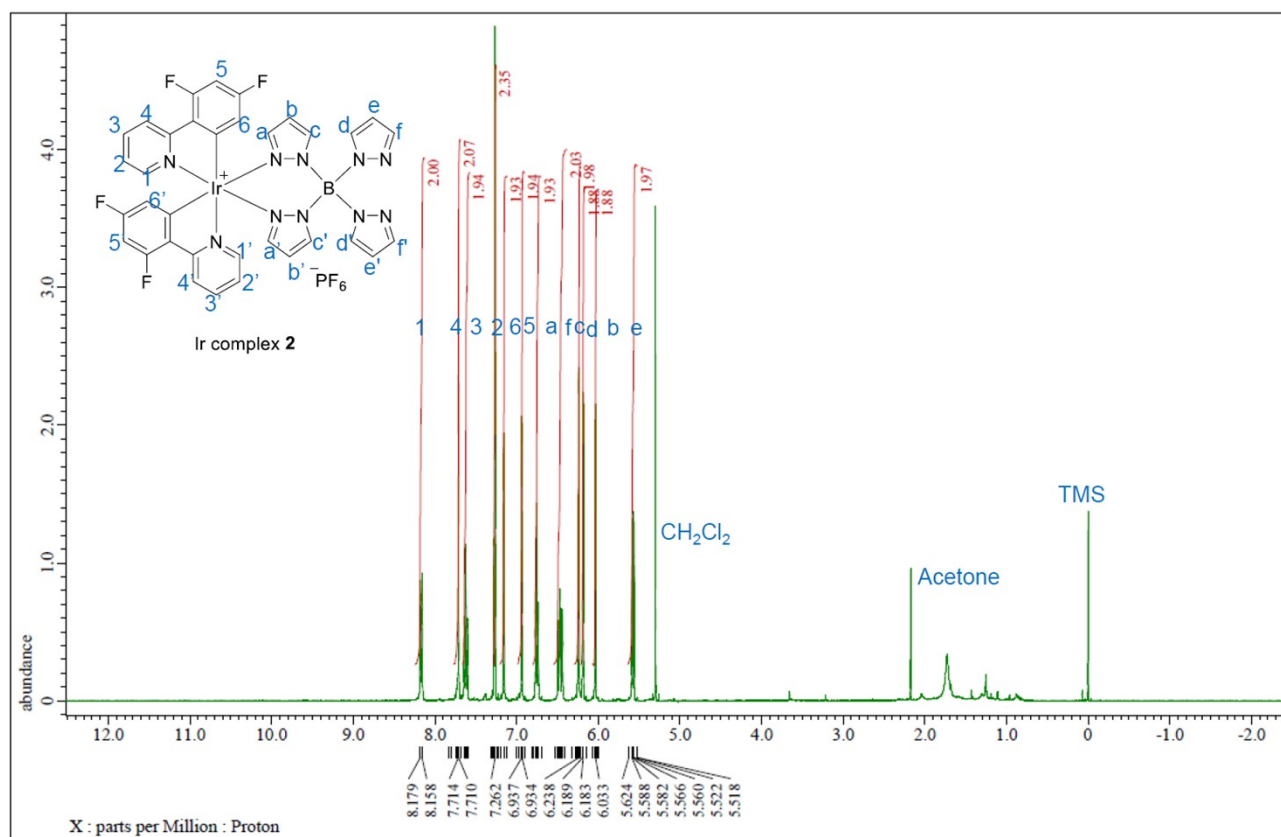

Chart S1. <sup>1</sup>H NMR spectrum of Ir complex 2.

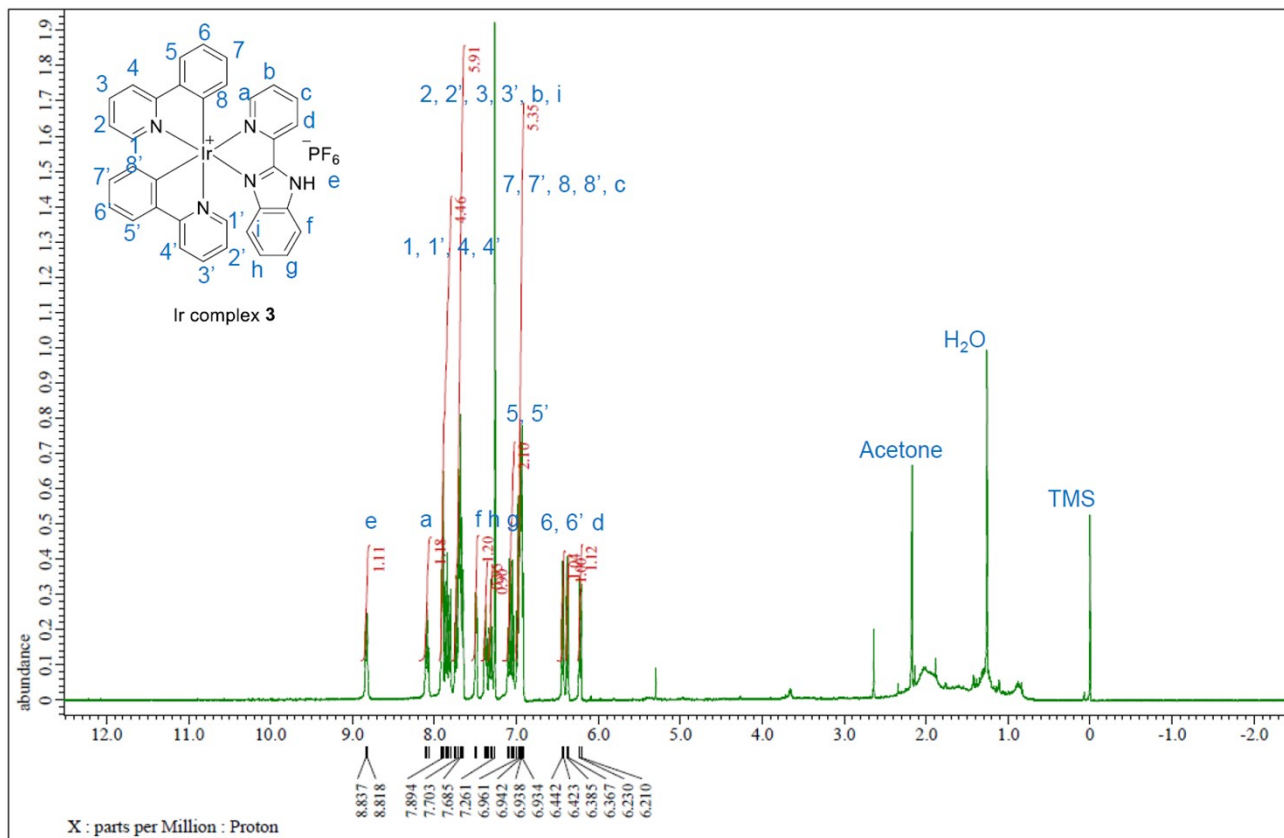

Chart S2. <sup>1</sup>H NMR spectrum of Ir complex 3.

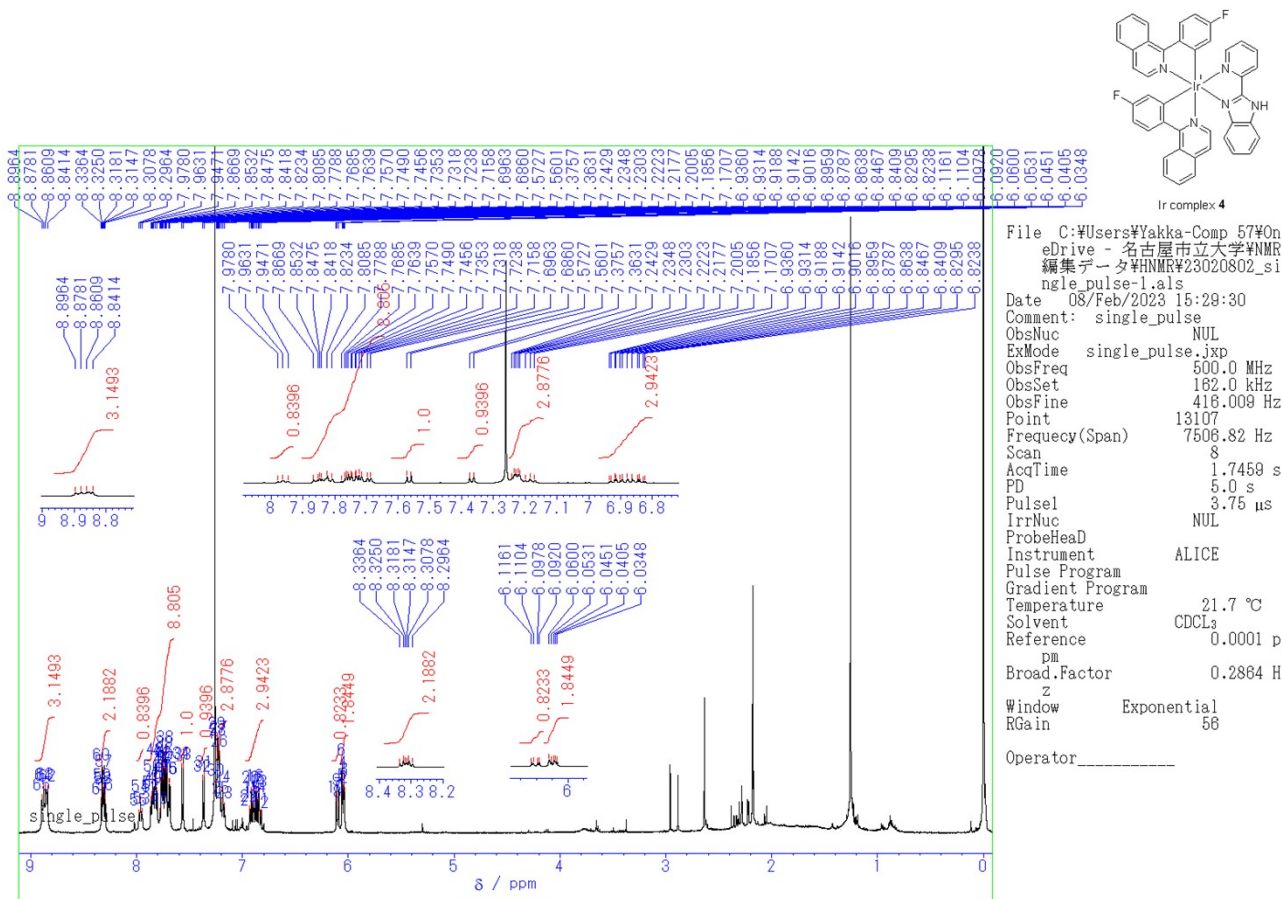

Chart S3. <sup>1</sup>H NMR spectrum of Ir complex 4.

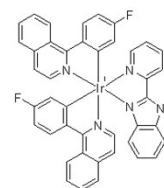

Ir complex 4

File C:\Users\Yakka-Comp 57\OneDrive - 名古屋市立大学\NMR 編集データ\CNMR\23020901.a1

Original File: ¥¥172.25.198.11\¥¥DATA\¥¥YAKKA\¥¥SAITOH\¥¥23020901.s

Date 08/Feb/2023 20:12:16  
 Comment:  
 ObsNuc <sup>13</sup>C  
 ObsFreq 125.86 MHz  
 ObsSet -1.0 kHz  
 ObsFine 997.2585 H

Pulse1 6.8 µs  
 Pulse2 0.0 µs  
 Pulse3 0.0 µs  
 P11 0.0 ms  
 P12 0.0 ms  
 P13 0.0 ms  
 Loop1 0  
 Point 131072(ZeroFi)

11: × 4)  
 Scan 10000  
 DummyScan 0  
 Frequency(Span) 31250.0 Hz  
 AcqTime 1.0488 s  
 PD 1.9514 s  
 RGain 80  
 Broad.Factor 0.25 Hz  
 ExMode CARBON  
 IrrNuc <sup>1</sup>H  
 IrrFreq 0.0 MHz  
 IrrSet 0.0 kHz  
 IrrFine 0.0 Hz  
 IrrPulse 0 µs  
 IrrAttn 0  
 Spinning 0.0 Hz  
 Temperature 25.0 °C

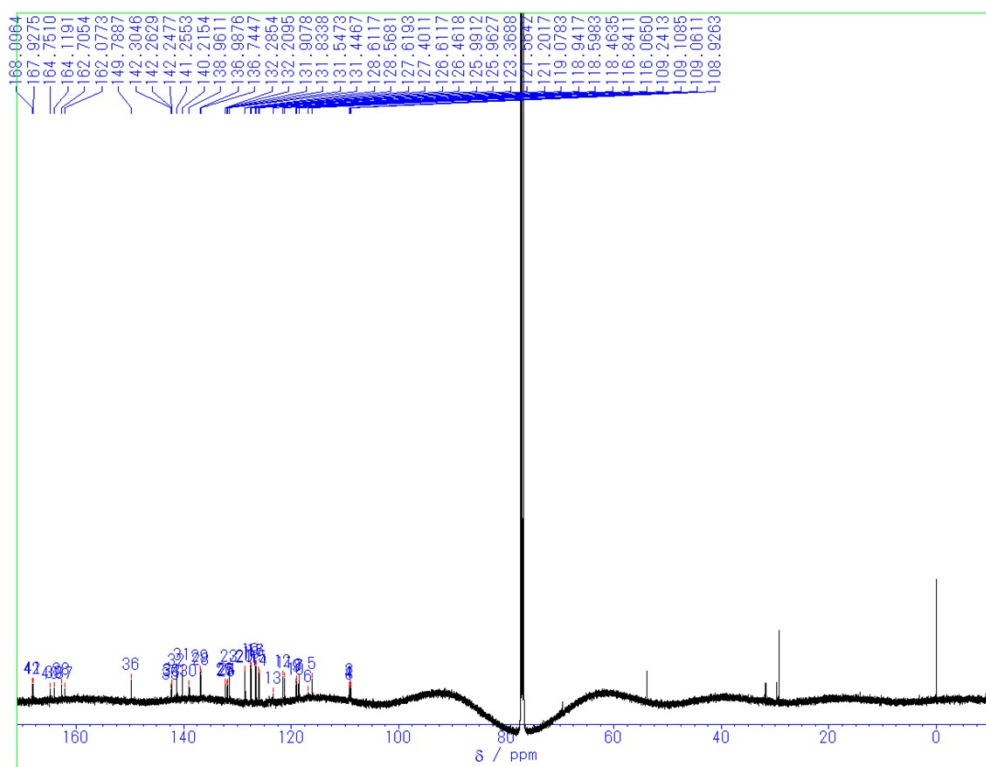

Chart S4. <sup>13</sup>C NMR spectrum of Ir complex 4.

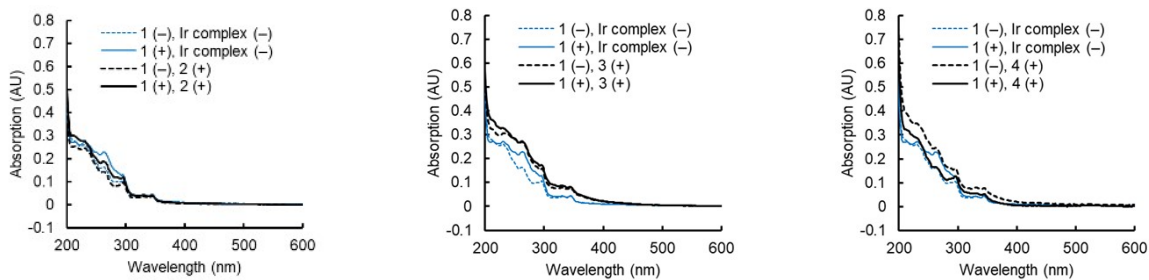

Figure S1. Absorption spectra of aqueous solutions of P-dots doped with various combinations of **1** and Ir complexes **2–4** as indicated. The increment of absorption around 300 to 400 nm is considered to be due to the doped Ir complexes.

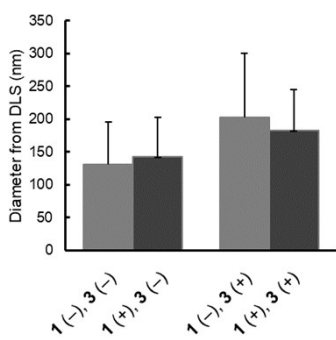

Figure S2. Diameter of doped P-dots. Solutions (1 mL) of undoped P-dots or P-dots doped with **1** or **3** or both were diluted 4-fold with MilliQ water and the diameter of the P-dots was determined by means of dynamic light scattering measurements. Data are expressed as mean + S.D.

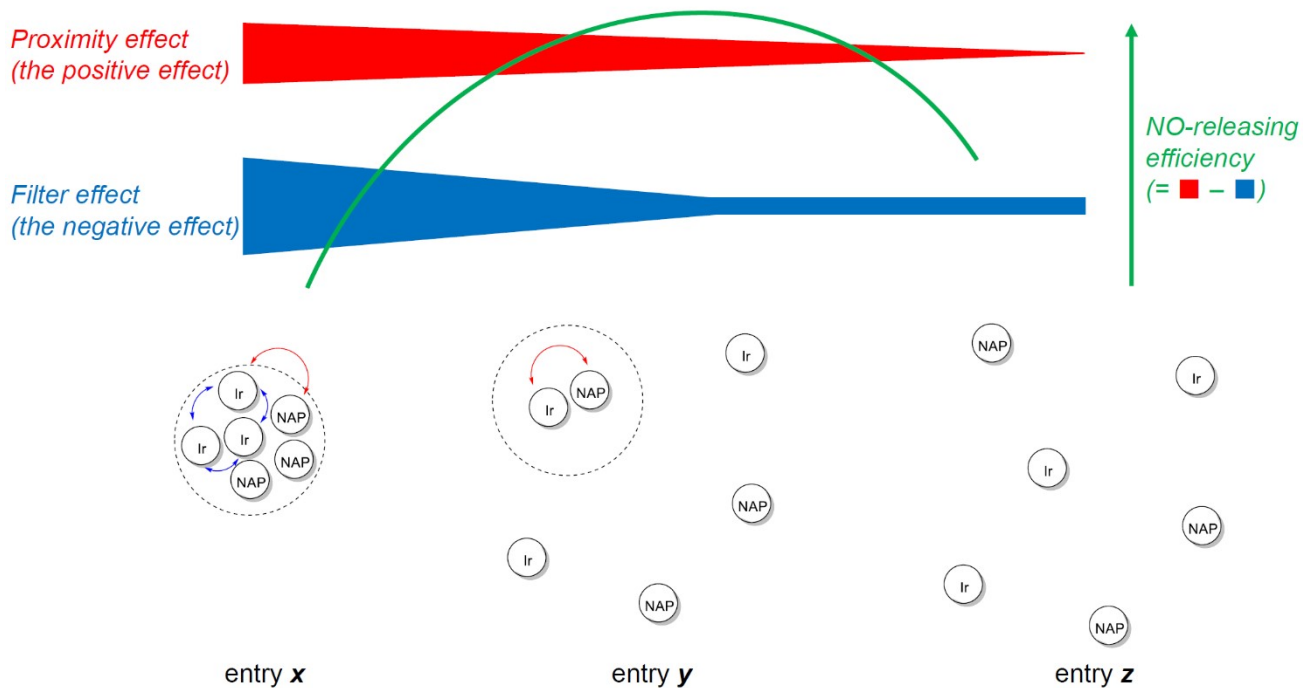

Figure S3. The schematic diagram for explanation of the difference of NO release in entry *x*, *y*, and *z*.



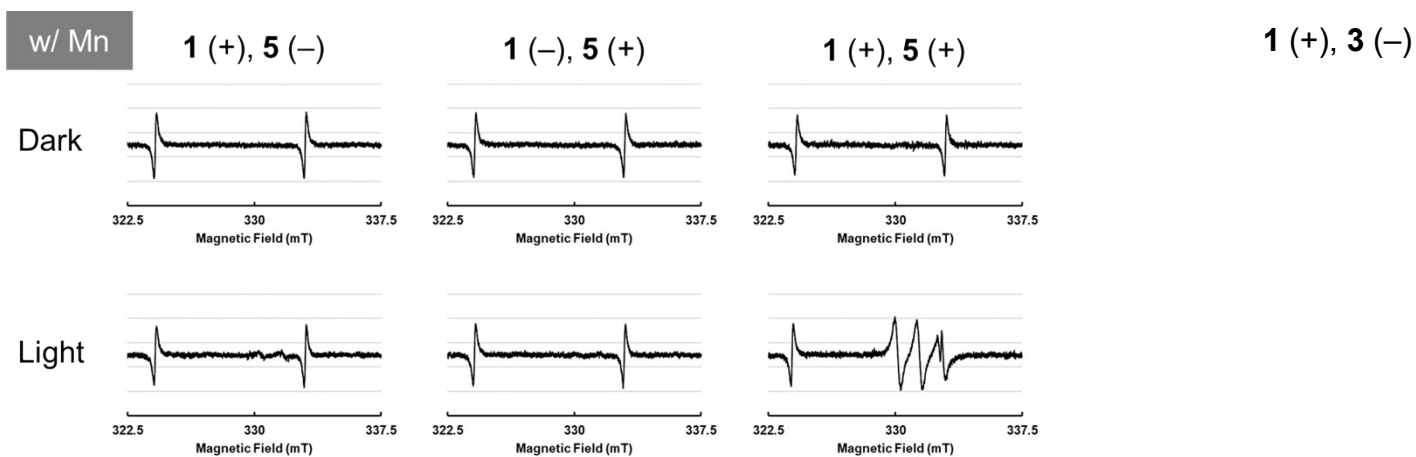

Figure S4. ESR spectra of P-dots doped with **1** or **3** or both, as indicated, together with  $\text{FeSO}_4 \cdot 7\text{H}_2\text{O}$  (1.5 mM) and *N*-methylglucamine dithiocarbamate (6 mM) in HEPES buffer were irradiated (430–460 nm, 12 mW cm<sup>-2</sup>, 10 min). ESR spectra were acquired using  $\text{Mn}^{2+}$  as a marker.
